# Supplementary material for: Effects of Substrates on Nucleation, Growth and Electrical Property of Vertical Few-Layer Graphene
Source: MDPI journal article supplement (doi:10.3390/nano12060971), 2022-03-15
Supplement: s1 [file s1]

# Effects of Substrates on Nucleation, Growth and Electrical Property of Vertical Few-Layer Graphene

Tianzeng Hong, Chan Guo, Yu Zhang \*, Runze Zhan, Peng Zhao, Baohong Li and Shaozhi Deng \*

State Key Laboratory of Optoelectronic Materials and Technologies, Guangdong Province Key Laboratory of Display Material and Technology, School of Electronics and Information Technology, Sun Yat-sen University, Guangzhou 510275, China; hongtz@mail2.sysu.edu.cn (T.H.); guoch5@mail2.sysu.edu.cn (C.G.); zhanrz3@mail.sysu.edu.cn (R.Z.); zhaop36@mail2.sysu.edu.cn (P.Z.); lbaoh@mail.sysu.edu.cn (B.L.)

\* Correspondence: stszhyu@mail.sysu.edu.cn (Y.Z.); stsdz@mail.sysu.edu.cn (S.D.)

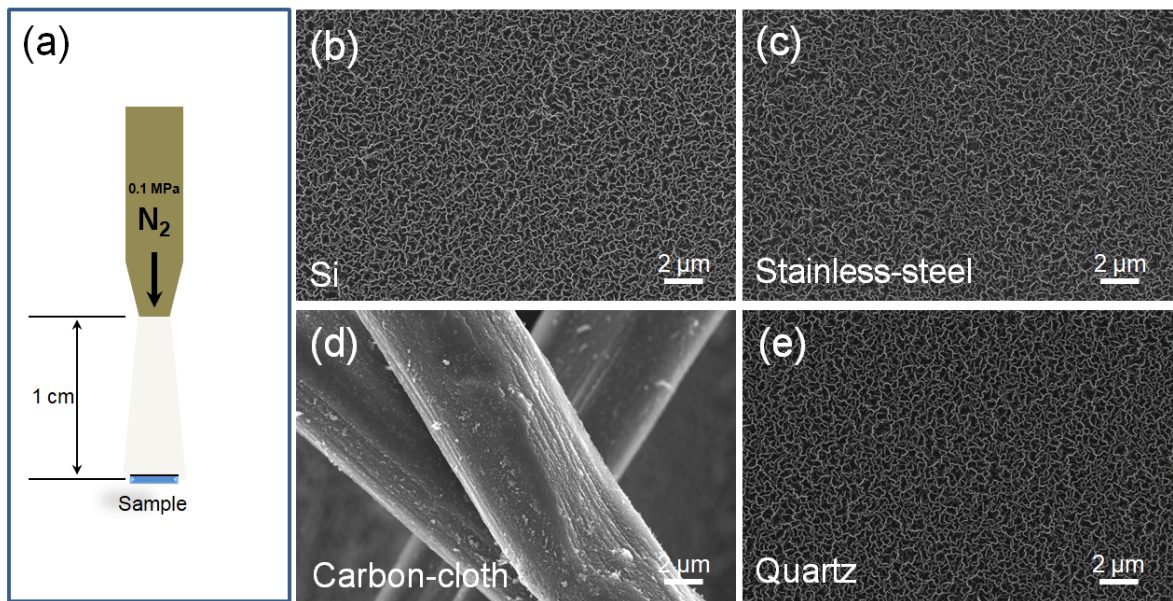

**Figure S1.** (a) Adhesion test of VFLG on different substrates. (b–e) SEM images of VFLG on four substrates after blowing N<sub>2</sub>, where (b) Si substrate, (c) stainless-steel substrate, (d) flexible carbon-cloth substrate, and (e) quartz substrate.

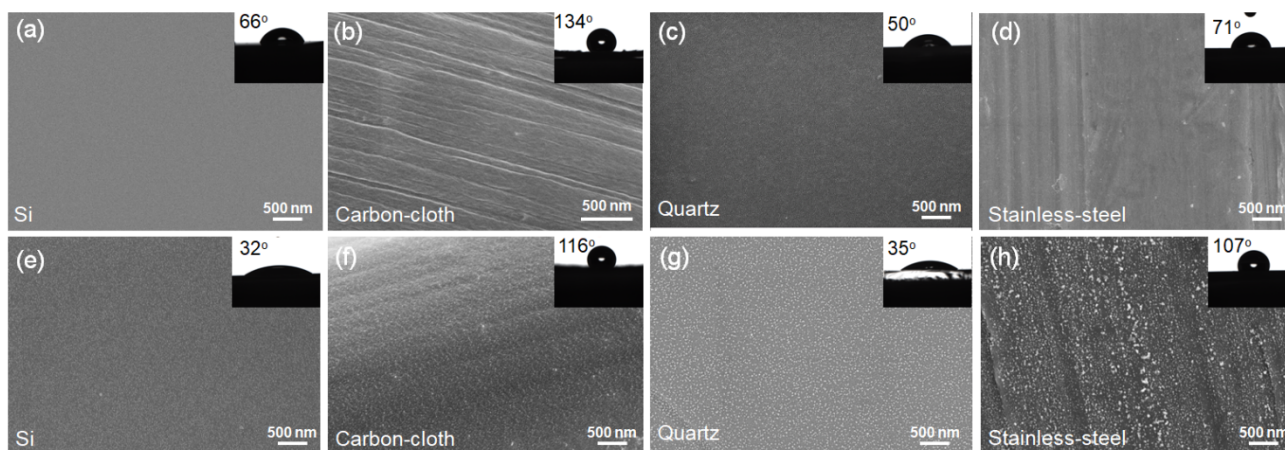

**Figure S2.** (a–d) SEM images of microscale surface morphology of the four substrates, where (a) Si substrate, (b) flexible carbon-cloth substrate, (c) quartz substrate and (d) stainless-steel substrate. (e–h) SEM images of microscale on the surface of substrates after the plasma bombardment pretreatment, where (e) Si substrate, (f) flexible carbon-cloth substrate, (g) quartz substrate and (h) stainless-steel substrate. Inserts are the contact angle which were tested using water as the medium dripped on the surface of substrates.

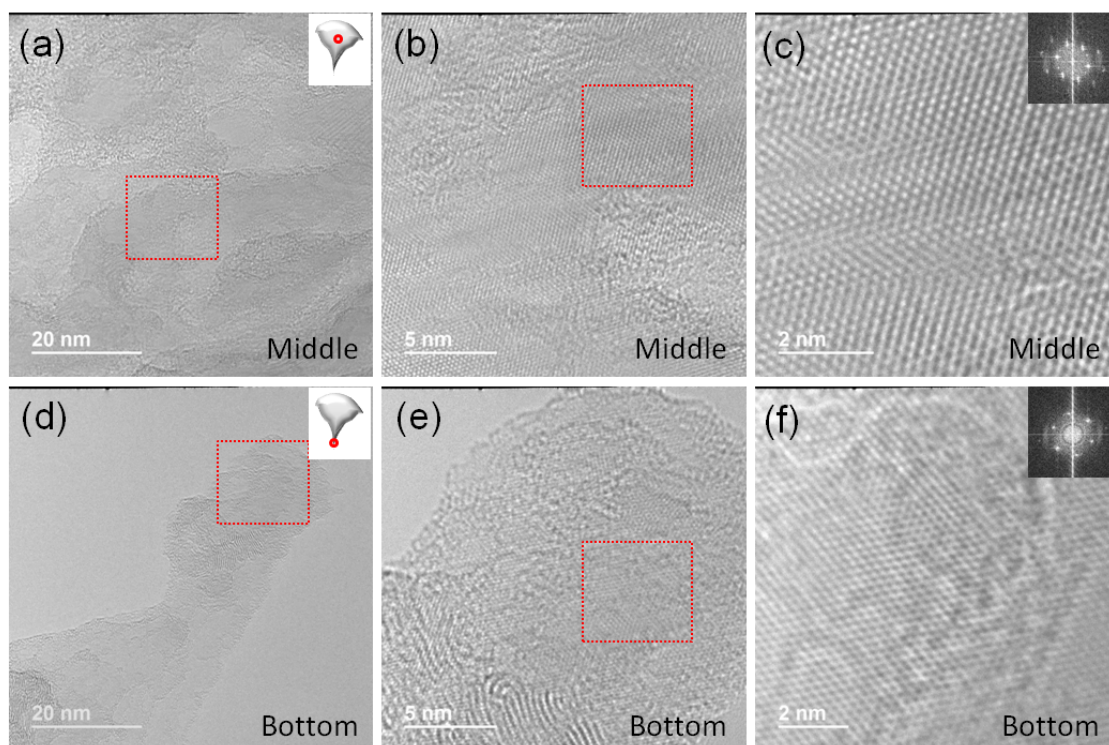

**Figure S3.** HRTEM images of a single VFLG sheet grown on Si substrates. (a) Middle of the single VFLG, (b) magnified image of the red rectangle area in (a), (c) HRTEM image of the red rectangle area in (b). (d) Bottom of the single VFLG, (e) magnified image of the red rectangle area in (d), (f) HRTEM image of the red rectangle area in (e). Insets of (a) and (d) show the position of HRTEM images on the VFLG sheet. Insets of (c) and (f) show the diffraction pattern of VFLG.



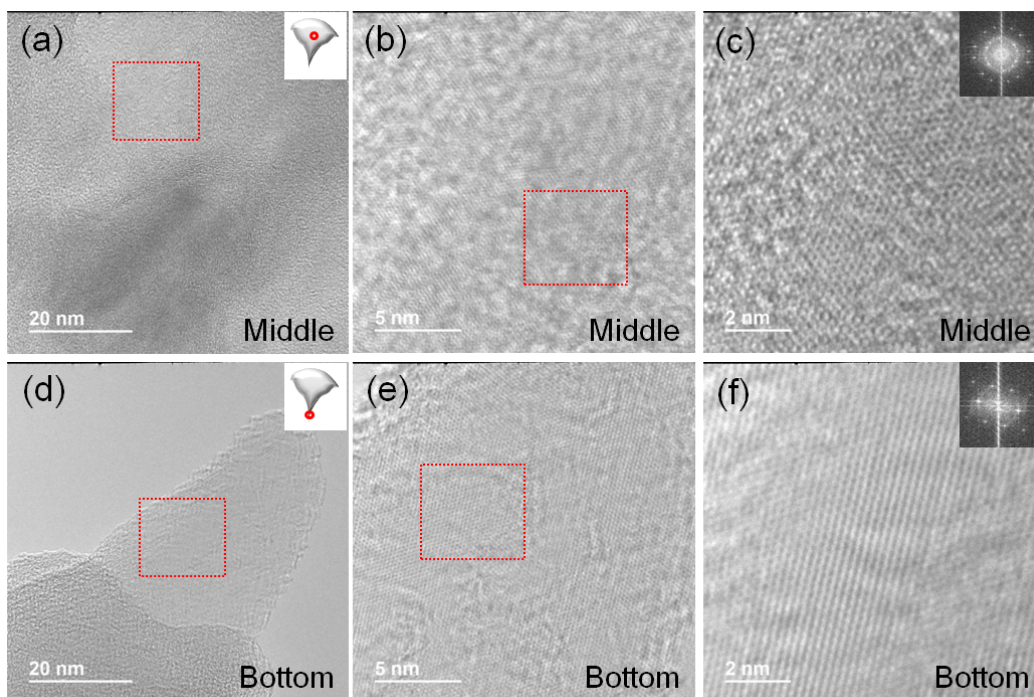

**Figure S4.** HRTEM images of a single VFLG sheet grown on stainless-steel substrates. (a) Middle of the single VFLG, (b) magnified image of the red rectangle area in (a), (c) HRTEM image of the red rectangle area in (b). (d) Bottom of the single VFLG, (e) magnified image of the red rectangle area in (d), (f) HRTEM image of the red rectangle area in (e). Insets of (a) and (d) show the position of HRTEM images on the VFLG sheet. Insets of (c) and (f) show the diffraction pattern of VFLG.

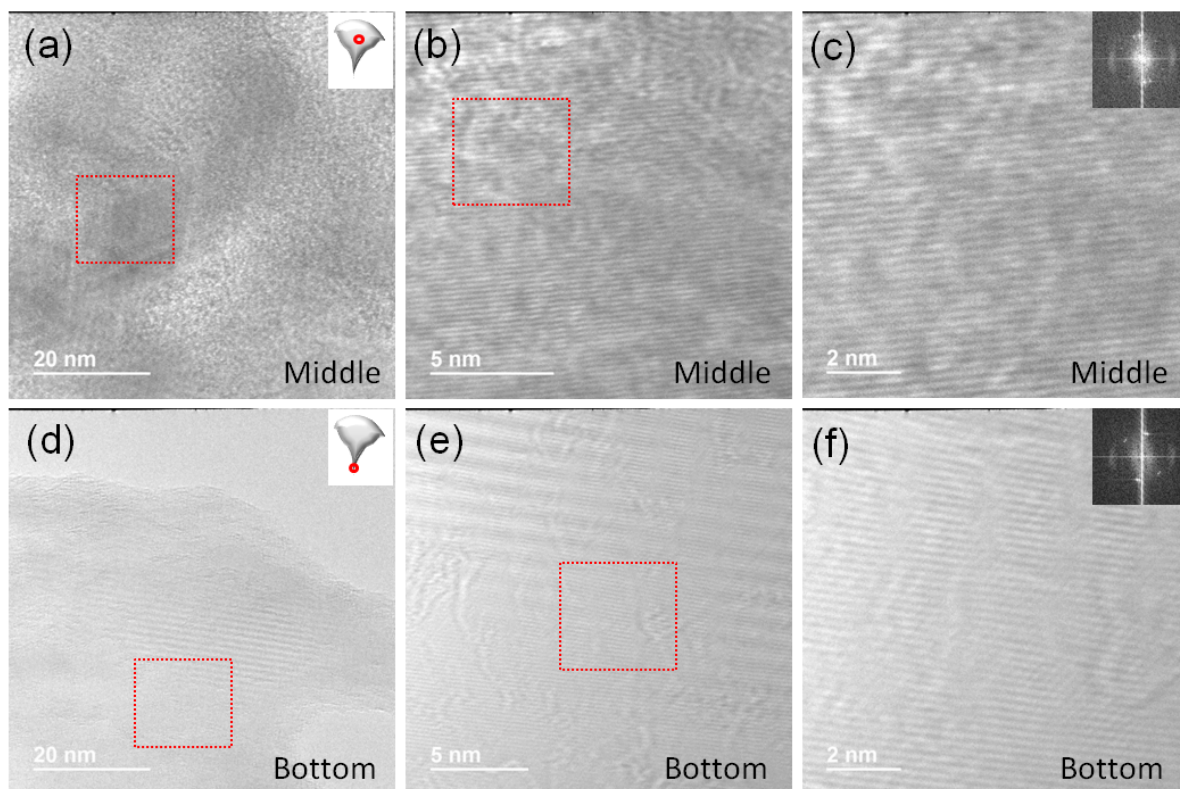

**Figure S5.** HRTEM images of single VFLG sheet grown on flexible carbon-cloth substrates. (a) Middle of the single VFLG, (b) magnified image of the red rectangle area in (a), (c) HRTEM image of the red rectangle area in (b). (d) Bottom of the single VFLG, (e) magnified image of the red rectangle area in (d), (f) HRTEM image of the red rectangle area in (e). Insets of (a) and (d) show the position of HRTEM images on the VFLG sheet. Insets of (c) and (f) show the diffraction pattern of VFLG.

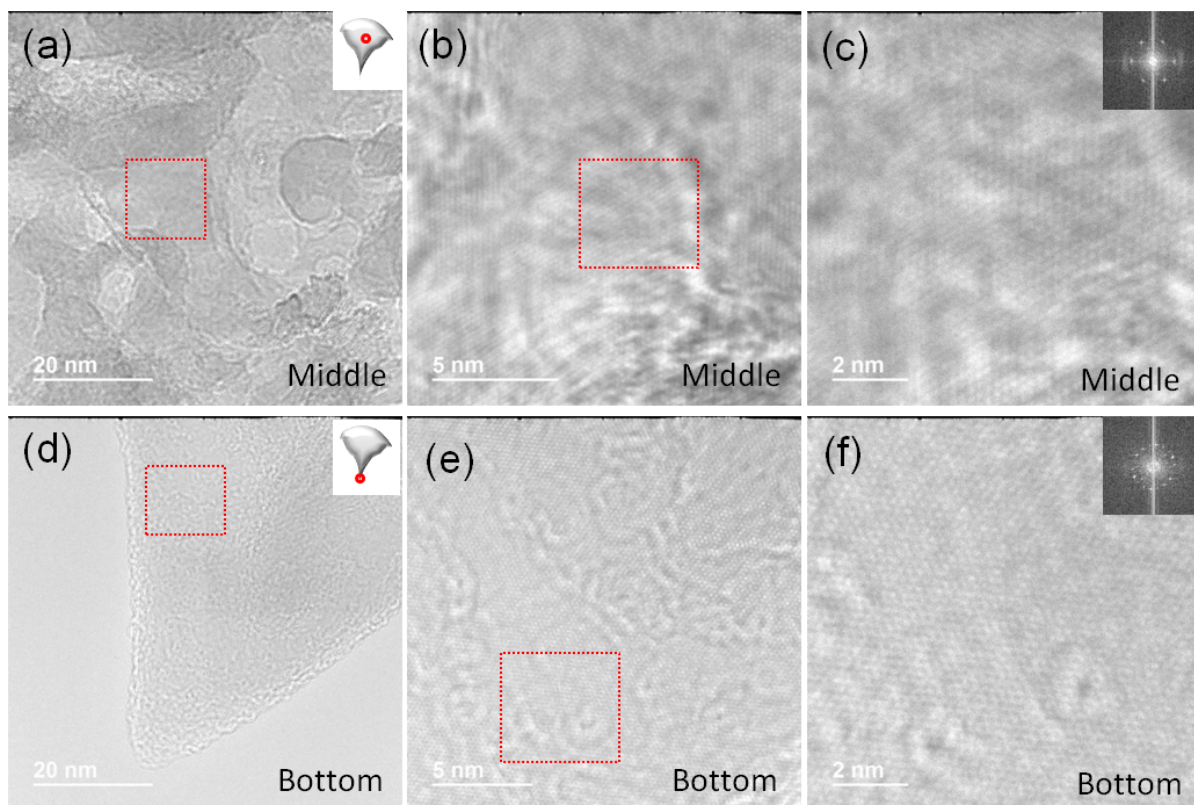

**Figure S6.** HRTEM images of single VFLG sheet grown on quartz substrates. (a) Middle of the single VFLG, (b) magnified image of the red rectangle area in (a), (c) HRTEM image of the red rectangle area in (b). (d) Bottom of the single VFLG, (e) magnified image of the red rectangle area in (d), (f) HRTEM image of the red rectangle area in (e). Insets of (a) and (d) show the position of HRTEM images on the VFLG sheet. Insets of (c) and (f) show the diffraction pattern of VFLG.

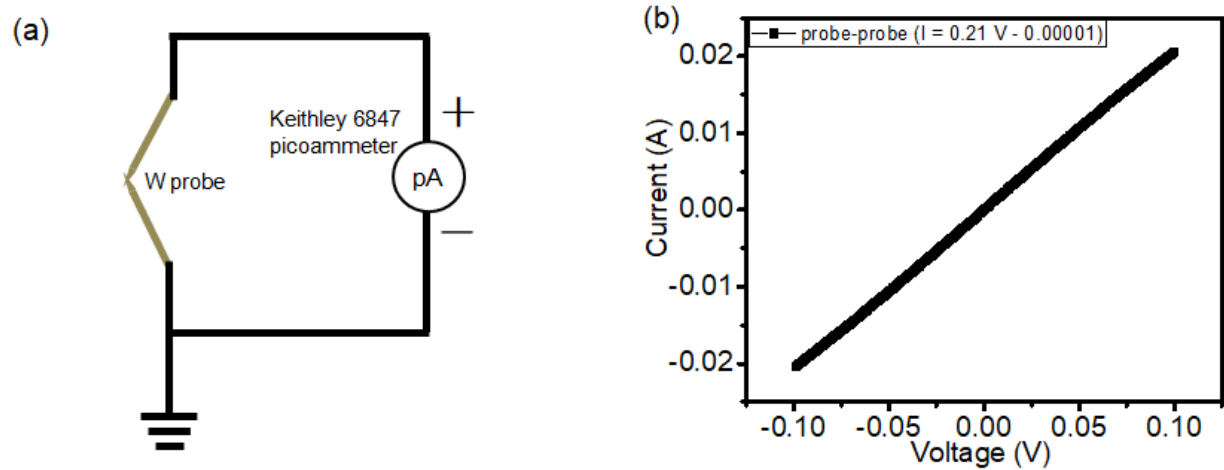

**Figure S7.** (a) The electrical test circuit of W probe to W probe test, and (b) the  $I$ - $V$  curve of the W probe to W probe test.

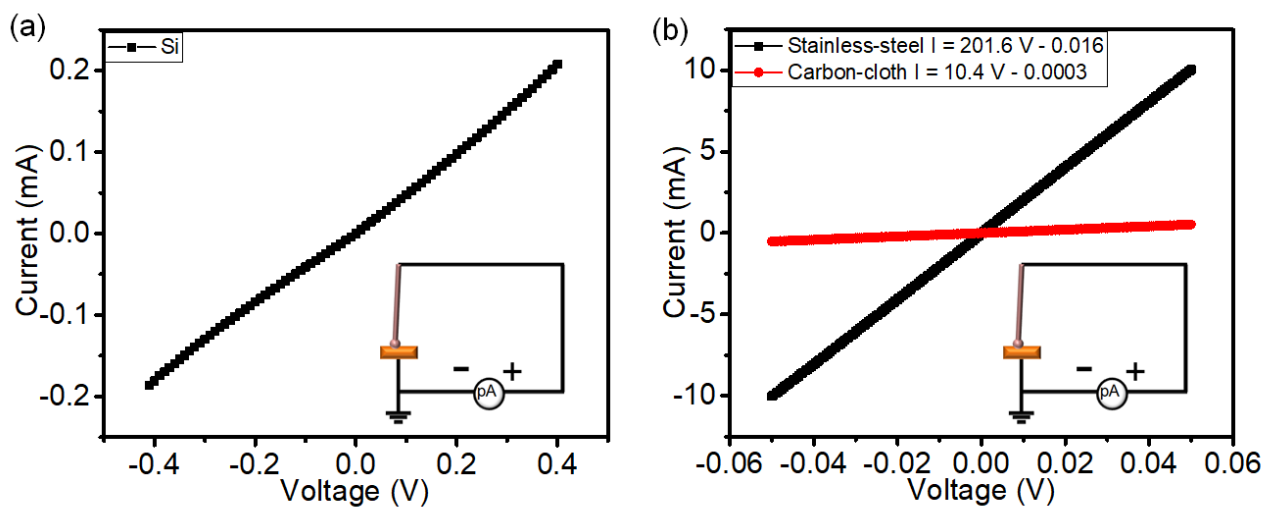

**Figure S8.** (a) *I-V* curve of the W probe to the Si substrate, (b) *I-V* curve of W probe to the stainless-steel and flexible carbon-cloth substrate. Insert is the test circuit diagram.



**Table S1.** Thermal conductivity and electrical conductivity of the Si and stainless-steel substrates.

| Substrate       | Thermal conductivity (W/m K) | Electrical conductivity (S/m) |
|-----------------|------------------------------|-------------------------------|
| n-Si            | 133 [1]                      | $1.56 \times 10^{-3}$ [2]     |
| Stainless-steel | 14 [3]                       | $9 \times 10^6$ [4]           |

## Reference

1. J.H. Kim, A. Feldman, D. Novotny. Application of the Three Omega Thermal Conductivity Measurement Method to a Film on a Substrate of Finite Thickness, J. Appl. Phys. 1999, 86, 3959-3963.
2. D. A. Tsukanov, S. V. Ryzhkov, I. A. BeIous, O. A. Utas, V. G. Lifshits. Electrical Conductivity of Surface Phases on Silicon. Proc. of SPIE. 2003, 5129, 295-304.
3. R. S. Graves, T. G. Kollie, D. L. Mcelroy, K. E. Gilchrist. The Thermal Conductivity of AISI 304 L Stainless Steel. Int. J. Thermophys. 1991, 12, 409-415.
4. Y. Tian. Electrical Conductivity and Magnetic Permeability Measurement of Case Hardened Steels. AIP Conf. Proc. 2015, 1650, 462-469.
